# Supplementary material for: A Role for the VPS Retromer in Brucella Intracellular Replication Revealed by Genomewide siRNA Screening
Source: PubMed Central journal article supplement (PMC6595151; doi:10.1128/msphere.00380-19), 2019-06-26
Supplement: mSphere.00380-19-st004.pdf [file mSphere.00380-19-st004.pdf]

**Table S4**

| siRNA      | VPS35       |              | VPS29      |              | VPS26       |              |
|------------|-------------|--------------|------------|--------------|-------------|--------------|
|            | AVG         | SD           | AVG        | SD           | AVG         | SD           |
| siVPS35    | <b>21.5</b> | <b>± 2.4</b> | 25.8       | ± 11.5       | 25.1        | ± 6.2        |
| siVPS29    | 105.8       | ± 10.4       | <b>6.6</b> | <b>± 5.3</b> | 90.2        | ± 36.8       |
| siVPS26A   | 65.5        | ± 13.9       | 21.1       | ± 21.5       | <b>10.6</b> | <b>± 2.9</b> |
| siVPS26A/B | 49.5        | ± 12.9       | 23.7       | ± 31.3       | <b>5.5</b>  | <b>± 3.3</b> |
